# Supplementary material for: Loss of the neural-specific BAF subunit ACTL6B relieves repression of early response genes and causes recessive autism
Source: PubMed Central journal article supplement — Proc Natl Acad Sci U S A. 2020 Apr 20;117(18):10055–66. doi: 10.1073/pnas.1908238117 (PMC7211998; doi:10.1073/pnas.1908238117), 2020-04-20

## **Wenderski et al. Supplementary File 3**

### **This file contains:**

- Raw Western blot scans
- Repeated experiments
- Genotyping

## Western blot scans related to Figs. 2A and S4A, B

HEK293T cells transduced with wild type or ASD mutant ACTL6B (BAF53b) expressed from EF1a (constitutive) promoter. Cells were selected continuously with hygromycin over 10 days.

**LI-COR**

Image ID: 0004961\_06  
Acquire Time: Jul 3, 2018 2:27:24 PM

Page 1

### Acquisition Information

| # | Image ID   | Acquire Time           | Channels | Resolution | Intensities | Quality | Analysis | Image Name | Comment |
|---|------------|------------------------|----------|------------|-------------|---------|----------|------------|---------|
| 1 | 0004961_06 | Jul 3, 2018 2:27:24 PM | 700 800  | 169um      | Auto Auto   | medium  | Manual   | 0004961_06 |         |

### Image Display Values

| Channel | Color | Minimum | Maximum | K |
|---------|-------|---------|---------|---|
| 700     | Red   | 0.191   | 294     | 1 |
| 800     | Green | 0.0561  | 68.5    | 0 |

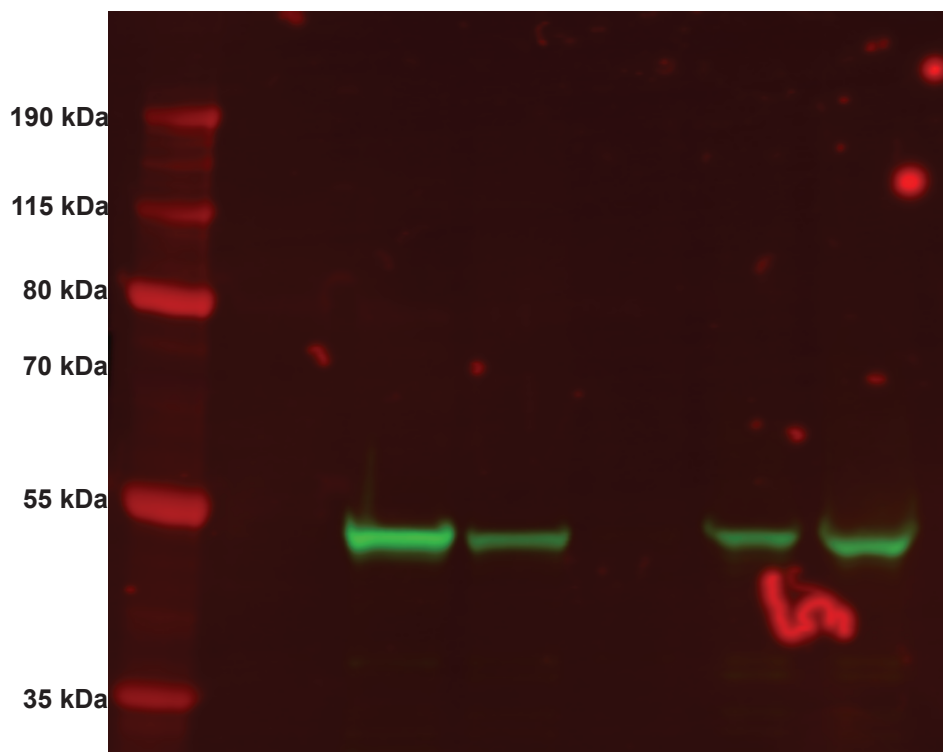

Lanes:

1. Page Ruler Plus
2. N144 vector with RFP
3. N144 vector with BAF53b wild type
4. N144 vector with BAF53b L154F
5. N144 vector with BAF53b T175P
6. N144 vector with BAF53b G393R
7. N144 vector with BAF53b G417W

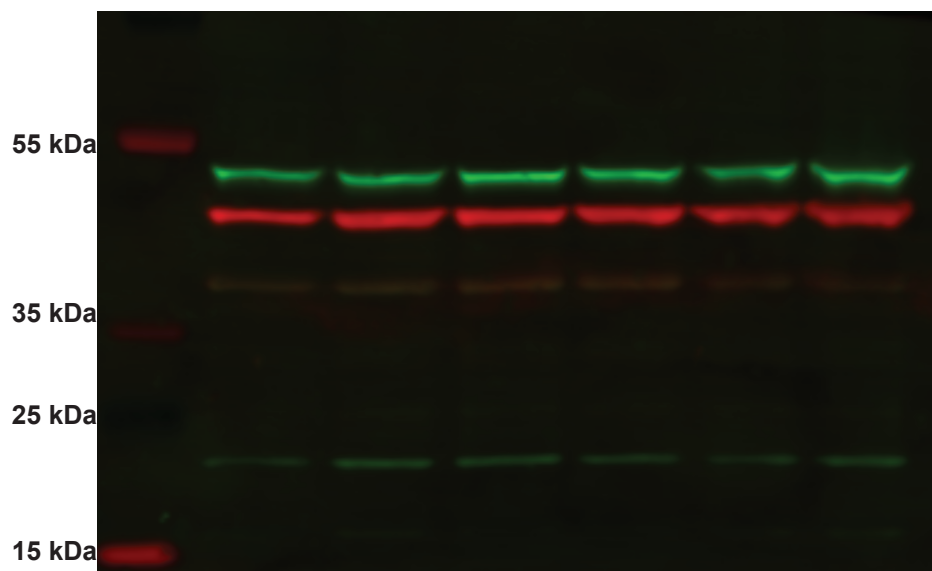

**Western blot scans related to Figs. 2A and S4A, B (repeated experiment)**

HEK293Ts transduced with pInducer20 containing wild type or ASD mutant *BAF53b*. Where indicated "+Dox", 1 ug/mL fresh doxycycline was applied daily for 7 days. Cytoplasmic fractions.

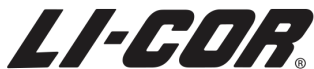

Image ID: 0003489\_01  
Acquire Time: Apr 14, 2017 1:17:58 PM

Page 1

Acquisition Information

| # | Image ID   | Acquire Time            | Channels | Resolution | Intensities | Quality | Analysis | Image Name | Comment |
|---|------------|-------------------------|----------|------------|-------------|---------|----------|------------|---------|
| 1 | 0003489_01 | Apr 14, 2017 1:17:58 PM | 700 800  | 169um      | Auto Auto   | high    | Manual   | 0003489_01 |         |

Image Display Values

| Channel | Color | Minimum | Maximum | K    |
|---------|-------|---------|---------|------|
| 700     | Red   | 0.628   | 14.0    | 0.5  |
| 800     | Green | 0.400   | 2.95    | 0.37 |

1st scan:  
immunoblot for Baf53b (rb) and Gapdh (ms)

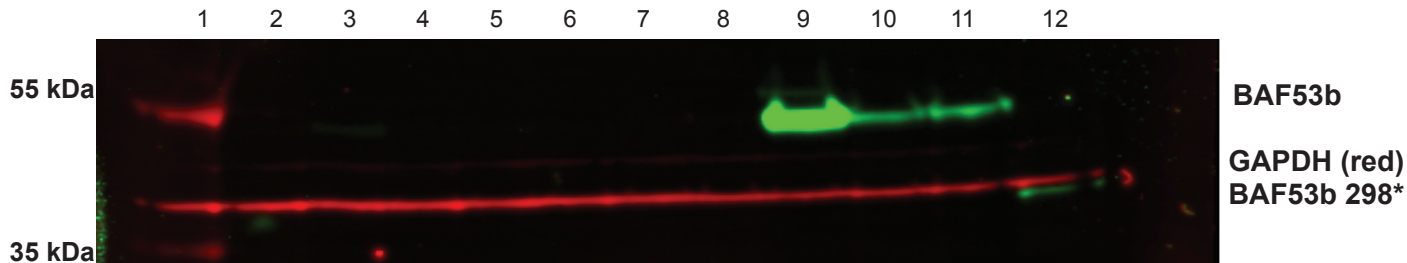

Lanes:

- |                          |                          |                                               |
|--------------------------|--------------------------|-----------------------------------------------|
| 1. Uninfected -dox*      | 6. BAF53b R298* -dox     | 11. BAF53b G393R +dox                         |
| 2. Empty vector- dox     | 7. Uninfected +dox       | 12. BAF53b R2988 +dox                         |
| 3. BAF53b wild type -dox | 8. Empty vector +dox     | *NOTE: ladder run with Uninfected -dox sample |
| 4. BAF53b L154F -dox     | 9. BAF53b wild type +dox |                                               |
| 5. BAF53b G393R -dox     | 10. BAF53b L154F +dox    |                                               |

### Western blot scans related to Figs. 2C, D; S4E

Primary E18.5 cortical or striatal neurons infected with lentivirus containing plInducer20 with wild type or ASD mutant *BAF53b*.

Infected on DIV5, +dox on DIV6, collected DIV22.

Whole cell extract.

# LI-COR®

Image ID: 0004995\_01  
Acquire Time: Jul 4, 2018 12:28:13 AM

Page 1

#### Acquisition Information

| # | Image ID   | Acquire Time            | Channels | Resolution | Intensities | Quality | Analysis | Image Name | Comment |
|---|------------|-------------------------|----------|------------|-------------|---------|----------|------------|---------|
| 1 | 0004995_01 | Jul 4, 2018 12:28:13 AM | 700 800  | 169um      | Auto Auto   | medium  | Manual   | 0004995_01 |         |

#### Image Display Values

| Channel | Color                       | Minimum | Maximum | K |
|---------|-----------------------------|---------|---------|---|
| 800     | Gray Scale (Black on White) | 0.482   | 15.0    | 1 |

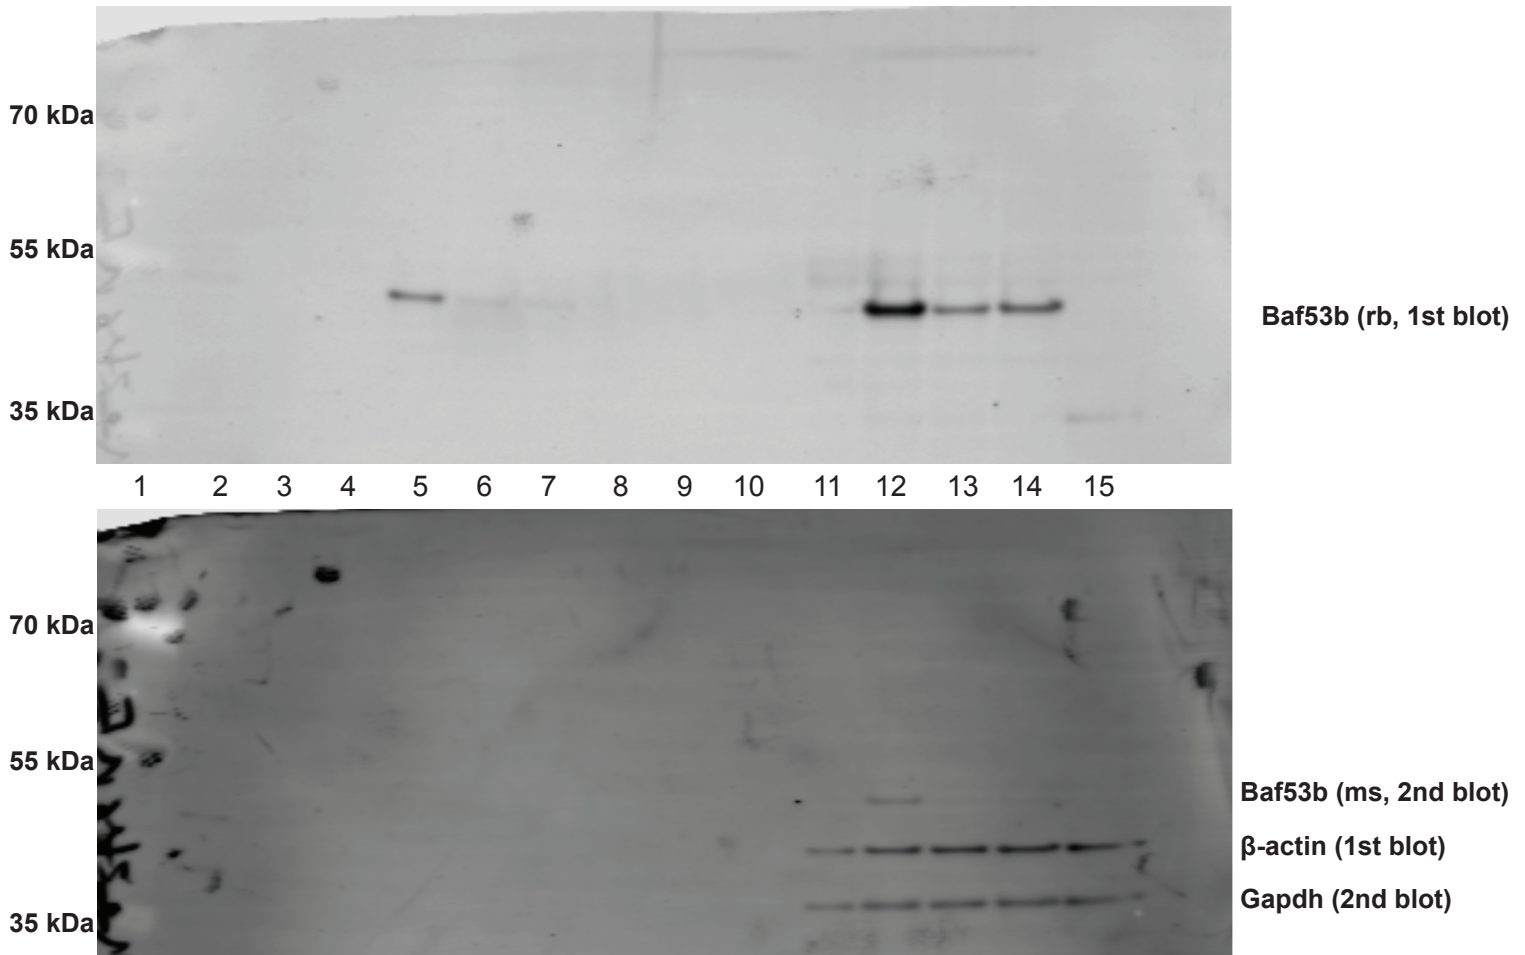

Lanes:

1. Page Ruler Plus
2. Cortical neurons, *Baf53b*<sup>+/+</sup> empty vector
3. Cortical neurons, *Baf53b*<sup>+/-</sup> empty vector
4. Cortical neurons, *Baf53b*<sup>-/-</sup> empty vector
5. Cortical neurons, *Baf53b*<sup>-/-</sup> BAF53b wild type
6. Cortical neurons, *Baf53b*<sup>-/-</sup> BAF53b L154F
7. Cortical neurons, *Baf53b*<sup>-/-</sup> BAF53b G393R
8. Cortical neurons, *Baf53b*<sup>-/-</sup> BAF53b R298\*
9. empty
10. empty
11. Striatal neurons, *Baf53b*<sup>-/-</sup> empty vector
12. Striatal neurons, *Baf53b*<sup>-/-</sup> BAF53b wild type
13. Striatal neurons, *Baf53b*<sup>-/-</sup> BAF53b L154F
14. Striatal neurons, *Baf53b*<sup>-/-</sup> BAF53b G393R
15. Striatal neurons, *Baf53b*<sup>-/-</sup> BAF53b R298\*

## Western blot scans related to Figs. 2C, D; S4E

Primary E18.5 cortical or striatal neurons infected with lentivirus containing plInducer20 with wild type or ASD mutant *BAF53b*.

Infected on DIV5, +dox on DIV6, collected DIV22.

Immunoprecipitation with anti-Brg1 (H-10) from nuclear extract (43 ug).

**LI-COR**

Image ID: 0003624\_01  
Acquire Time: May 5, 2017 5:49:30 PM

Page 1

### Acquisition Information

| # | Image ID   | Acquire Time           | Channels | Resolution | Intensities | Quality | Analysis | Image Name | Comment |
|---|------------|------------------------|----------|------------|-------------|---------|----------|------------|---------|
| 1 | 0003624_01 | May 5, 2017 5:49:30 PM | 700 800  | preview    | Auto Auto   | lowest  | Manual   | 0003624_01 |         |

### Image Display Values

| Channel | Color | Minimum | Maximum | K |
|---------|-------|---------|---------|---|
| 800     | Green | 0.702   | 1.78    | 0 |

Immunoblot for Brg1 (G-7), Baf53b (rb), b-actin (rb)

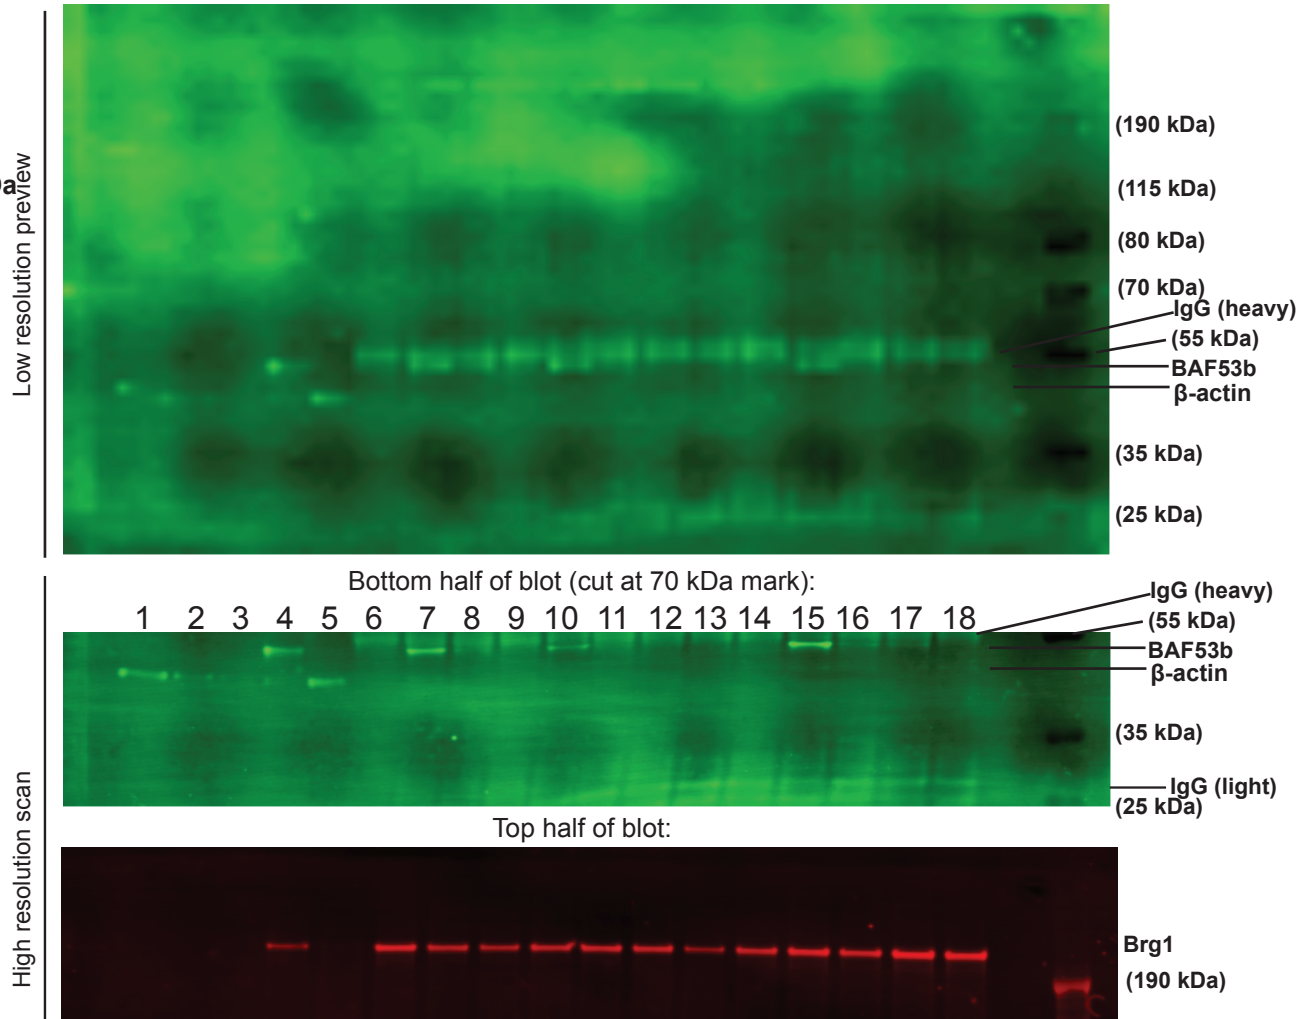

### Lanes:

- |                                                                              |                                                                              |
|------------------------------------------------------------------------------|------------------------------------------------------------------------------|
| 1. Cortical neurons, cytosol: <i>Baf53b</i> <sup>+/+</sup> empty vector      | 11. Cortical neurons, Brg1 IP: <i>Baf53b</i> <sup>-/-</sup> BAF53b L154F     |
| 2. Cortical neurons, cytosol: <i>Baf53b</i> <sup>+/-</sup> empty vector      | 12. Cortical neurons, Brg1 IP: <i>Baf53b</i> <sup>-/-</sup> BAF53b G393R     |
| 3. Cortical neurons, cytosol: <i>Baf53b</i> <sup>-/-</sup> empty vector      | 13. Cortical neurons, Brg1 IP: <i>Baf53b</i> <sup>-/-</sup> BAF53b R298*     |
| 4. Cortical neurons, cytosol: <i>Baf53b</i> <sup>-/-</sup> BAF53b wild type  | 14. Striatal neurons, Brg1 IP: <i>Baf53b</i> <sup>-/-</sup> empty vector     |
| 5. Cortical neurons, input: <i>Baf53b</i> <sup>-/-</sup> empty vector        | 15. Striatal neurons, Brg1 IP: <i>Baf53b</i> <sup>-/-</sup> BAF53b wild type |
| 6. Cortical neurons, IgG IP: <i>Baf53b</i> <sup>+/+</sup> empty vector       | 16. Striatal neurons, Brg1 IP: <i>Baf53b</i> <sup>-/-</sup> BAF53b L154F     |
| 7. Cortical neurons, Brg1 IP: <i>Baf53b</i> <sup>+/+</sup> empty vector      | 17. Striatal neurons, Brg1 IP: <i>Baf53b</i> <sup>-/-</sup> BAF53b G393R     |
| 8. Cortical neurons, Brg1 IP: <i>Baf53b</i> <sup>+/-</sup> empty vector      | 18. Striatal neurons, Brg1 IP: <i>Baf53b</i> <sup>-/-</sup> BAF53b R298*     |
| 9. Cortical neurons, Brg1 IP: <i>Baf53b</i> <sup>-/-</sup> empty vector      | 19. empty well                                                               |
| 10. Cortical neurons, Brg1 IP: <i>Baf53b</i> <sup>-/-</sup> BAF53b wild type | 20. Page Ruler Plus                                                          |

**Western blot scans related to Figs. 2B and S4C**

iPSC-derived neurons from 2 affected siblings ( $BAF53b^{L154F/L154F}$ ) and unaffected father ( $BAF53b^{+/L154F}$ ) from Family 2703, and unaffected control ( $BAF53b^{+/+}$ ).

Whole cell protein extracts. 3 sets of samples collected at separate times after >30 days neural induction.

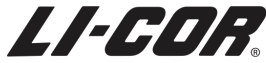

Image ID: 0005001\_04  
Acquire Time: Jul 4, 2018 12:52:10 AM

Page 1

Acquisition Information

| # | Image ID   | Acquire Time            | Channels | Resolution | Intensities | Quality | Analysis | Image Name | Comment |
|---|------------|-------------------------|----------|------------|-------------|---------|----------|------------|---------|
| 1 | 0005001_04 | Jul 4, 2018 12:52:10 AM | 700 800  | 169um      | Auto Auto   | low     | Manual   | 0005001_04 |         |

Image Display Values

| Channel | Color | Minimum  | Maximum | K |
|---------|-------|----------|---------|---|
| 700     | Red   | 0.000119 | 223     | 0 |
| 800     | Green | 0.000119 | 30.7    | 0 |

Lanes:

1. Page Ruler Plus
2. Wild type control n1
3. Affected 2703-3 n1
4. Affected 2703-4 n1
5. Unaffected 2703 father n1

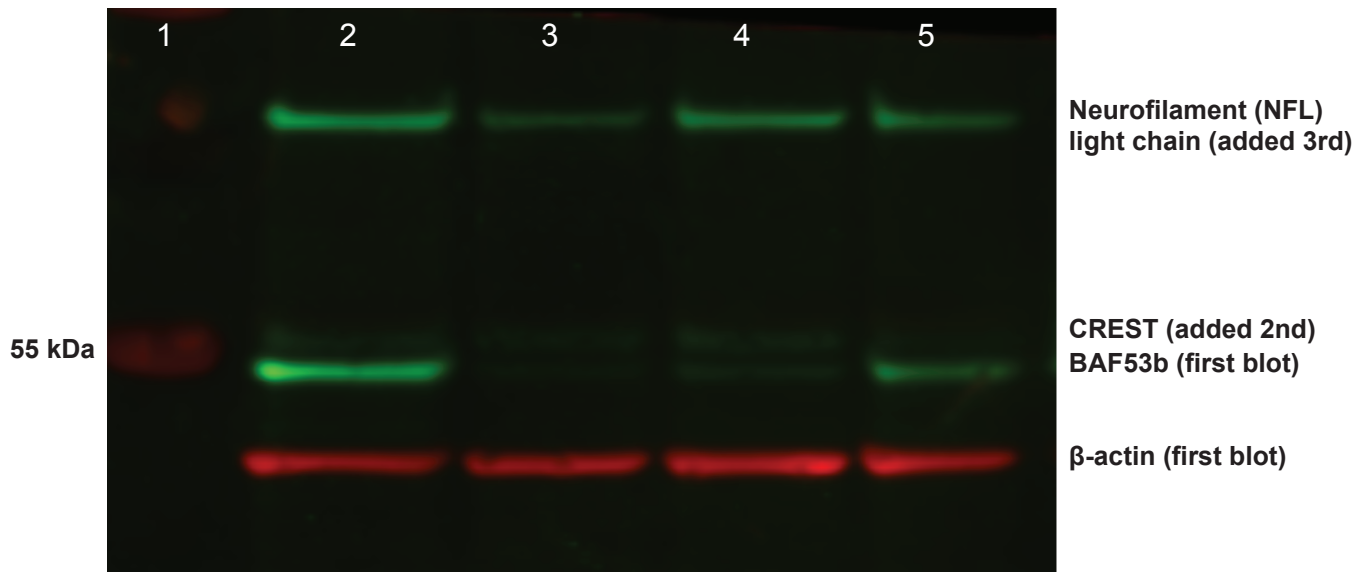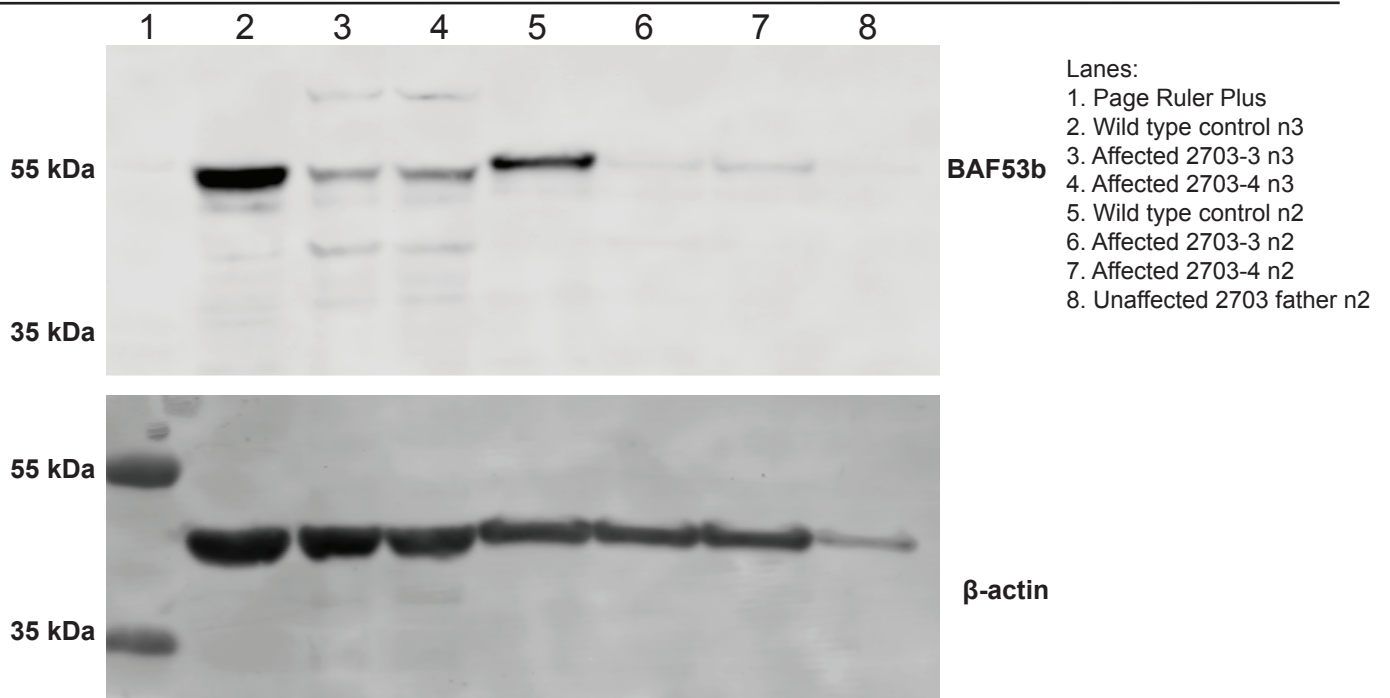

## Western blot scans related to Figs. 2B and S4C

iPSC-derived neurons from 2 affected siblings (*BAF53b*<sup>L154F/L154F</sup>) from Family 2703 and unaffected control (*BAF53b*<sup>+/+</sup>). Immunoprecipitation with anti-Brg1 (H-10) from nuclear extract (25 ug).

**LI-COR**

Image ID: 0004346\_01  
Acquire Time: Oct 4, 2017 5:25:32 PM

Page 1

### Acquisition Information

| # | Image ID   | Acquire Time           | Channels | Resolution | Intensities | Quality | Analysis | Image Name | Comment |
|---|------------|------------------------|----------|------------|-------------|---------|----------|------------|---------|
| 1 | 0004346_01 | Oct 4, 2017 5:25:32 PM | 700 800  | 169um      | Auto Auto   | high    | Manual   | 0004346_01 |         |

### Image Display Values

| Channel | Color                       | Minimum | Maximum | K |
|---------|-----------------------------|---------|---------|---|
| 800     | Gray Scale (Black on White) | 3.43    | 8.39    | 0 |

Bottom half of blot (cut at 70 kDa mark):

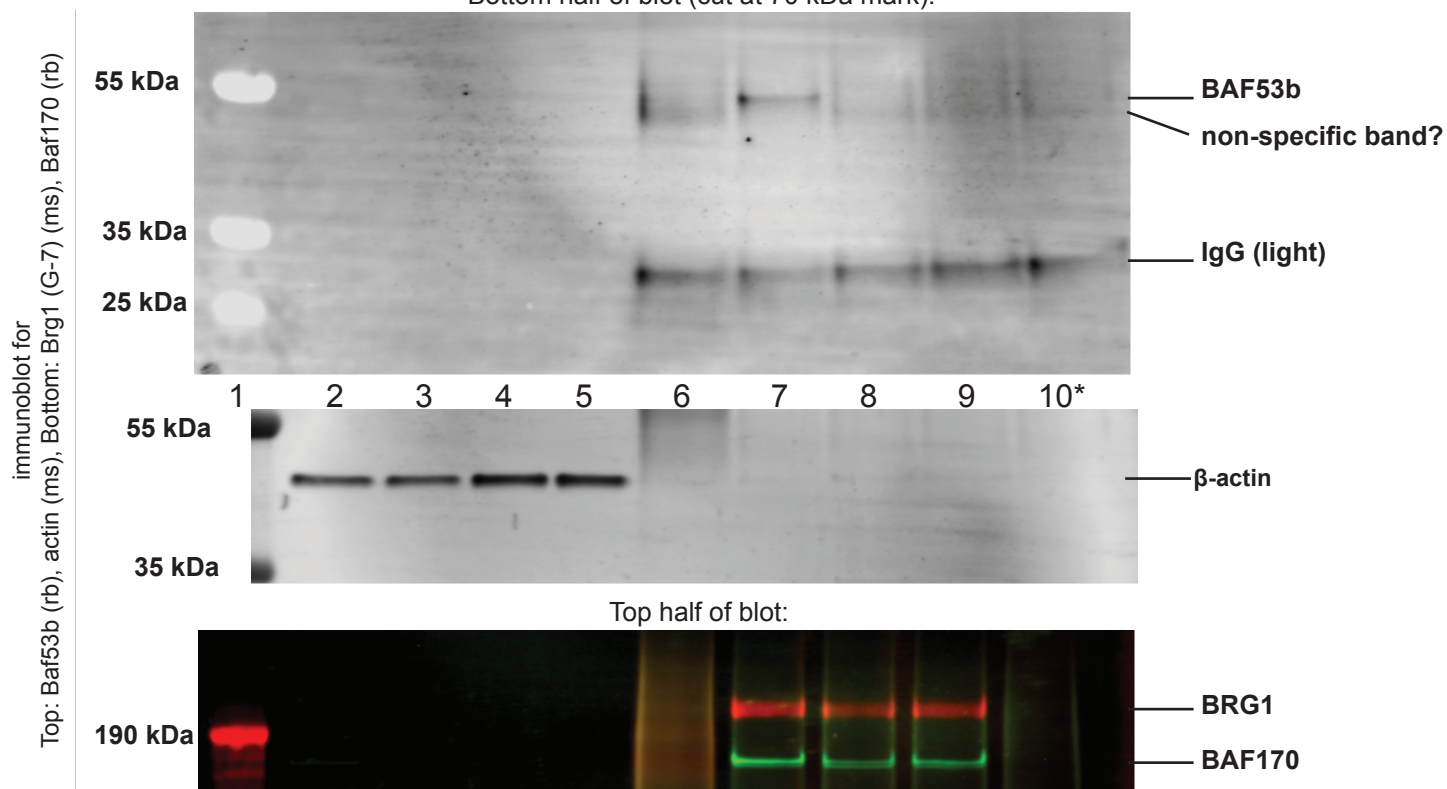

### Lanes:

1. Page Ruler Plus
2. Flow-through: Unaffected
3. Input: Unaffected
4. Input: Affected 1
5. Input: Affected 2
6. IgG IP: Unaffected
7. Brg1 IP: Unaffected
8. Brg1 IP: Affected 1
9. Brg1 IP: Affected 2
- 10\*: Brg1 IP: Unaffected relative with *BAF53b*<sup>+/L154F</sup> did not have enough starting sample for IP but tried it anyway

### Western blot scans related to Fig. S4A

HEK293Ts transduced with pInducer20 containing wild type or ASD mutant *BAF53b*. Where indicated "+Dox", 1 ug/mL fresh doxycycline was applied daily for 7 days. Immunoprecipitation with anti-Brg1 (H-10) from nuclear extract (250 ug).

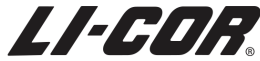

Image ID: 0003424\_01  
Acquire Time: Mar 31, 2017 8:33:55 PM

Page 1

1st scan:  
immunoblot for Baf53b (rb)

Acquisition Information

| # | Image ID   | Acquire Time            | Channels | Resolution | Intensities | Quality | Analysis | Image Name | Comment |
|---|------------|-------------------------|----------|------------|-------------|---------|----------|------------|---------|
| 1 | 0003424_01 | Mar 31, 2017 8:33:55 PM | 700 800  | 169um      | Auto Auto   | high    | Manual   | 0003424_01 |         |

Image Display Values

| Channel | Color | Minimum | Maximum | K |
|---------|-------|---------|---------|---|
| 800     | Green | 0.456   | 4.46    | 0 |

Bottom half of blot (cut at 70 kDa mark):

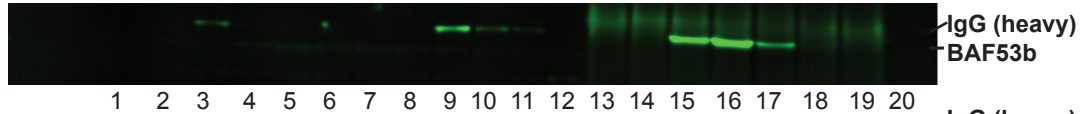

2nd scan:  
reprobe with  
b-actin (rb), b-actin (ms)

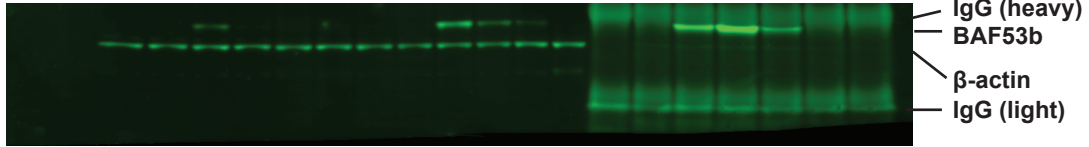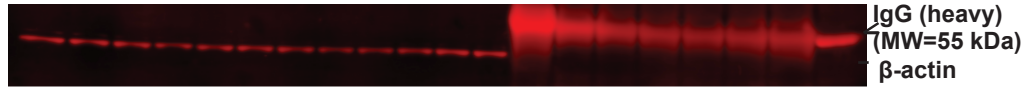

3rd scan:  
reprobe with  
Baf53a (rb)

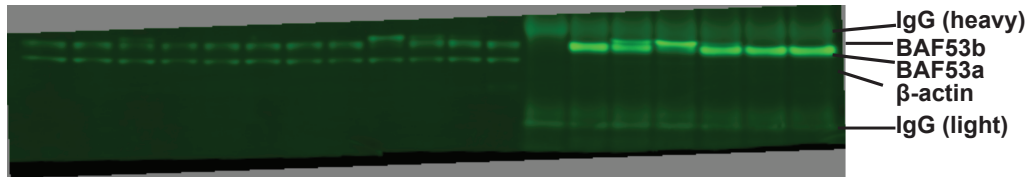

Top half of blot:

1st scan:  
Brg1 H-88 (rb), Kat6a (ms)

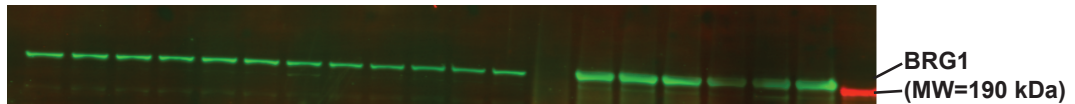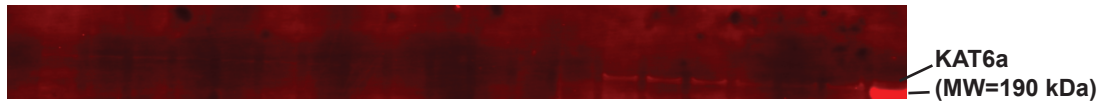

2nd scan:  
reprobe with  
Baf155 (rb), Brg1 G-7 (ms)

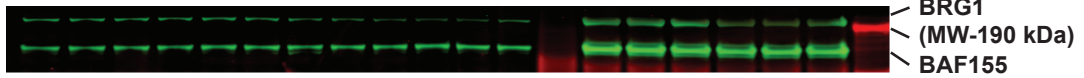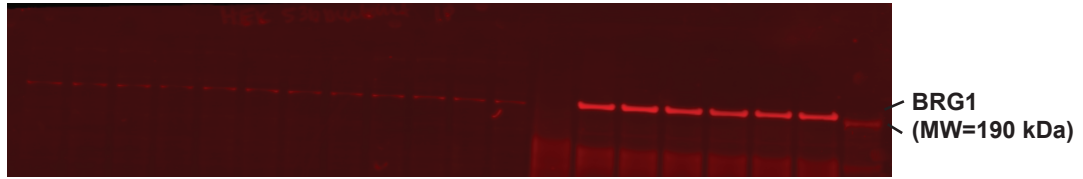

3rd scan:  
reprobe with  
MYH9 (rb)

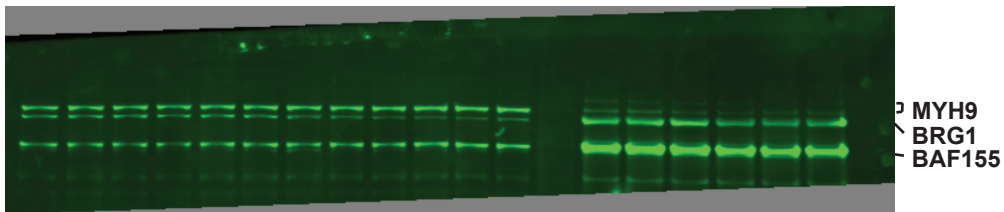

- Lanes:
- |                                 |                                 |                                    |                                    |
|---------------------------------|---------------------------------|------------------------------------|------------------------------------|
| 1. Input: uninfected -dox       | 6. Input: BAF53b R298* -dox     | 11. Input: BAF53b G393R +dox       | 16. Brg1 IP: BAF53b wild type +dox |
| 2. Input: empty vector- dox     | 7. Input: uninfected +dox       | 12. Input: BAF53b R2988 +dox       | 17. Brg1 IP: BAF53b L154F +dox     |
| 3. Input: BAF53b wild type -dox | 8. Input: empty vector +dox     | 13. IgG IP: uninfected +dox        | 18. Brg1 IP: BAF53b G393R+dox      |
| 4. Input: BAF53b L154F -dox     | 9. Input: BAF53b wild type +dox | 14. Brg1 IP: empty vector +dox     | 19. Brg1 IP: BAF53b R298* +dox     |
| 5. Input: BAF53b G393R -dox     | 10. Input: BAF53b L154F +dox    | 15. Brg1 IP: BAF53b wild type -dox | 20. Page Ruler Plus Ladder         |



**Western blot scans related to Fig. S4A (repeated experiment)**

HEK293Ts transduced with pInducer20 containing wild type or ASD mutant *BAF53b*. Where indicated "+Dox", 1 ug/mL fresh doxycycline was applied daily for 7 days. Immunoprecipitation with anti-Brg1 (H-10) from nuclear extract (250 ug).

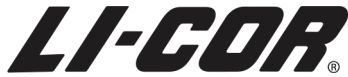

Image ID: 0004700\_07  
Acquire Time: May 3, 2018 3:49:01 PM

Page 1

Acquisition Information

| # | Image ID   | Acquire Time           | Channels | Resolution | Intensities | Quality | Analysis | Image Name | Comment |
|---|------------|------------------------|----------|------------|-------------|---------|----------|------------|---------|
| 1 | 0004700_07 | May 3, 2018 3:49:01 PM | 700 800  | 169um      | Auto Auto   | high    | Manual   | 0004700_07 |         |

Image Display Values

| Channel | Color | Minimum | Maximum | K |
|---------|-------|---------|---------|---|
| 800     | Green | 0.0869  | 11.6    | 0 |

Bottom half of blot (cut at 70 kDa mark):

1st scan:  
Immunoblot for Baf53b (rb), Brg1 (G-7) (ms)

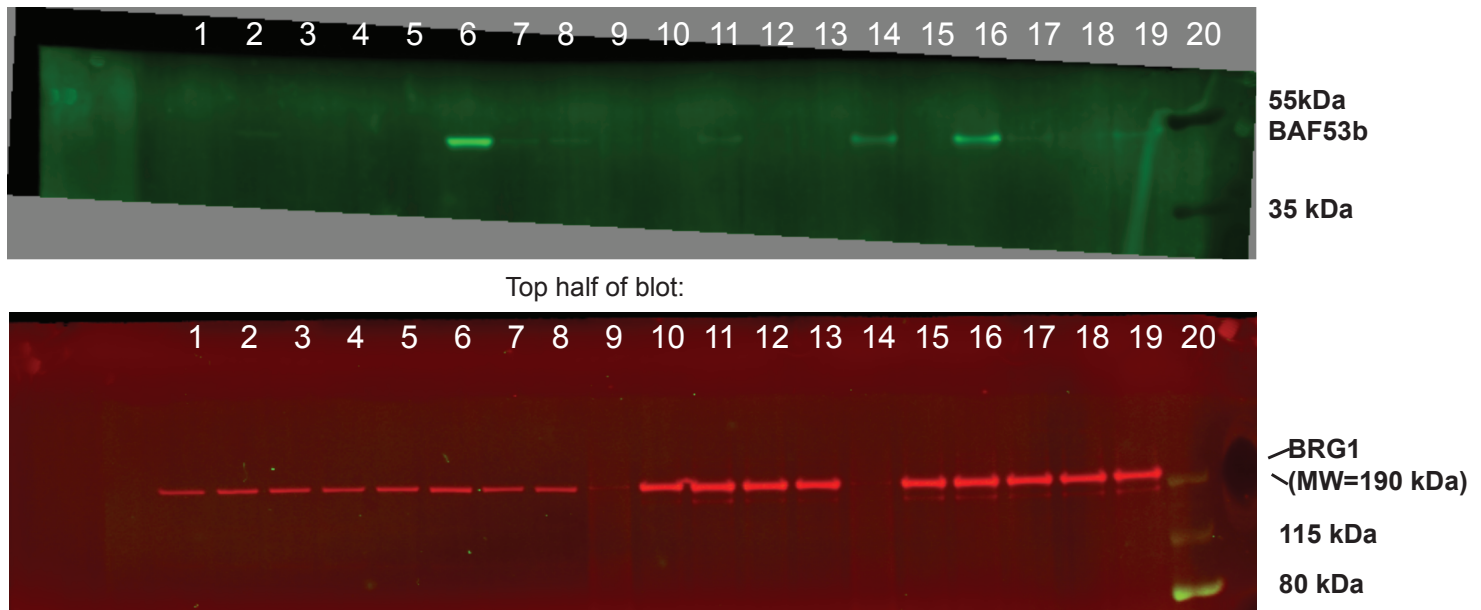

Lanes:

- |                                 |                                  |                                    |                                        |
|---------------------------------|----------------------------------|------------------------------------|----------------------------------------|
| 1. Input: empty vector -dox     | 6. Input: BAF53b wild type +dox  | 11. Brg1 IP: BAF53b wild type -dox | 16. Brg1 IP: BAF53b wild type +dox     |
| 2. Input: BAF53b wild type -dox | 7. Input: BAF53b L154F +dox      | 12. Brg1 IP: BAF53b L154F -dox     | 17. Brg1 IP: BAF53b L154F +dox         |
| 3. Input: BAF53b L154F -dox     | 8. Input: BAF53b G393R +dox      | 13. Brg1 IP: BAF53b G393R -dox     | 18. Brg1 IP: BAF53b G393R+dox          |
| 4. Input: BAF53b G393R -dox     | 9. IgG IP: BAF53b wild type -dox | 14. IgG IP: BAF53b wild type +dox  | 19. Brg1 IP: BAF53b wild type -dox n=2 |
| 5. Input: empty vector +dox     | 10. Brg1 IP: empty vector -dox   | 15. Brg1 IP: empty vector +dox     | 20. Page Ruler Plus Ladder             |

**Western blot scans related to Fig. S4D**

H9 hESCs infected with lentivirus containing plInducer20 with wild type or ASD mutant *BAF53b*. Immunoprecipitation with anti-Brg1 (G-7) from nuclear extract (90 ug).

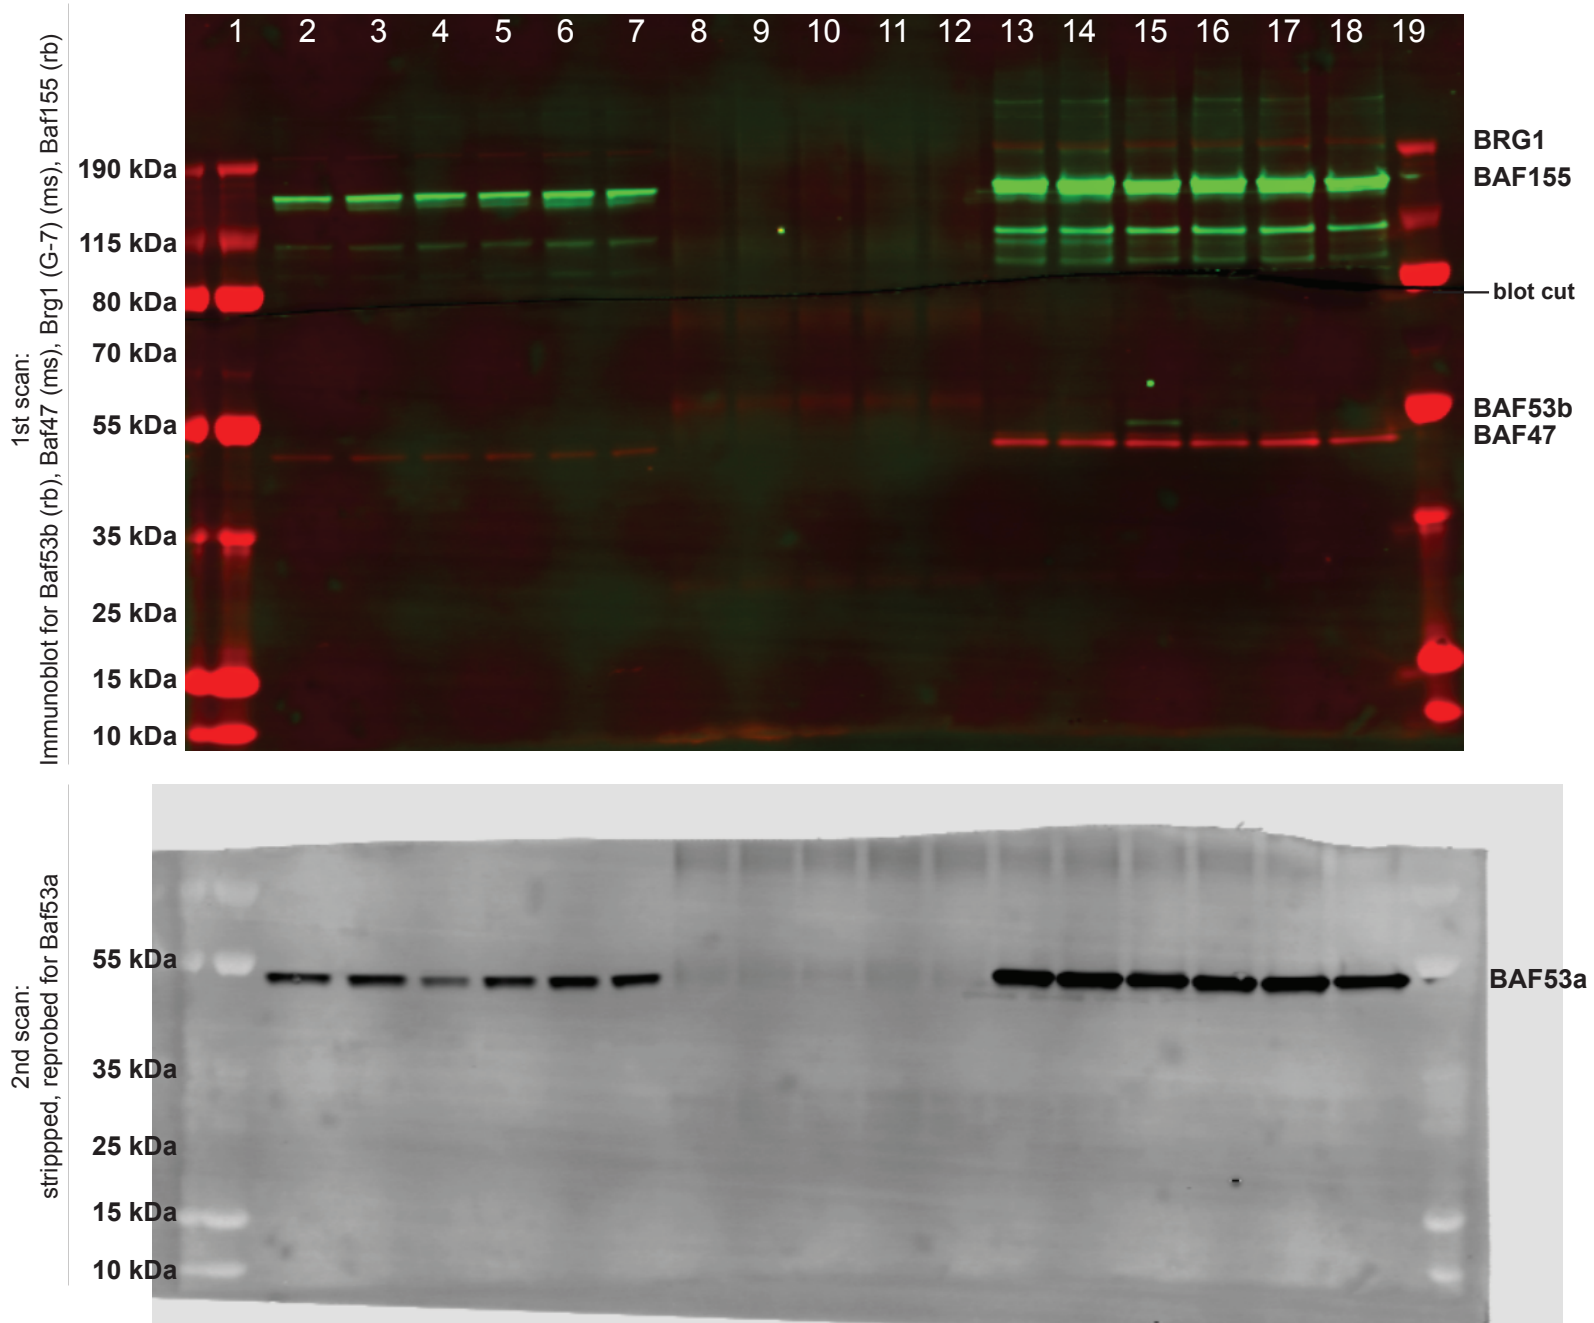

**Lanes:**

- |                                 |                                  |                                    |                                |
|---------------------------------|----------------------------------|------------------------------------|--------------------------------|
| 1. Page Ruler Plus Ladder       | 6. Input: BAF53b G393R +dox      | 11. IgG IP: BAF53b G393R +dox      | 16. Brg1 IP: BAF53b L154F +dox |
| 2. Input: empty vector -dox     | 7. Input: BAF53b R298* +dox      | 12. IgG IP: BAF53b R298* +dox      | 17. Brg1 IP: BAF53b G393R +dox |
| 3. Input: BAF53b wild type -dox | 8. Input: BAF53b G393R +dox      | 13. Brg1 IP: empty vector -dox     | 18. Brg1 IP: BAF53b R298*+dox  |
| 4. Input: BAF53b wild type +dox | 9. IgG IP: BAF53b wild type +dox | 14. Brg1 IP: BAF53b wild type -dox | 19. Page Ruler Plus Ladder     |
| 5. Input: BAF53b L154F +dox     | 10. IgG IP: BAF53b L154F +dox    | 15. Brg1 IP: BAF53b wild type +dox |                                |

**Western blot scans related to Fig. S6E**  
P0 cerebellar tissue, whole cell lysate.

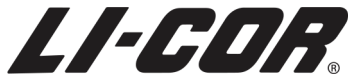

Image ID: 0005631\_01  
Acquire Time: Jan 11, 2019 11:06:47 PM

Acquisition Information

| # | Image ID   | Acquire Time             | Channels | Resolution | Intensities | Quality | Analysis | Image Name | Comment |
|---|------------|--------------------------|----------|------------|-------------|---------|----------|------------|---------|
| 1 | 0005631_01 | Jan 11, 2019 11:06:47 PM | 700 800  | 84um       | Auto Auto   | medium  | Manual   | 0005631_01 |         |

Image Display Values

| Channel | Color                       | Minimum | Maximum | K    |
|---------|-----------------------------|---------|---------|------|
| 700     | Gray Scale (Black on White) | 2.96    | 79.4    | 0    |
| 800     | Gray Scale (Black on White) | 0.239   | 12.8    | 0.41 |

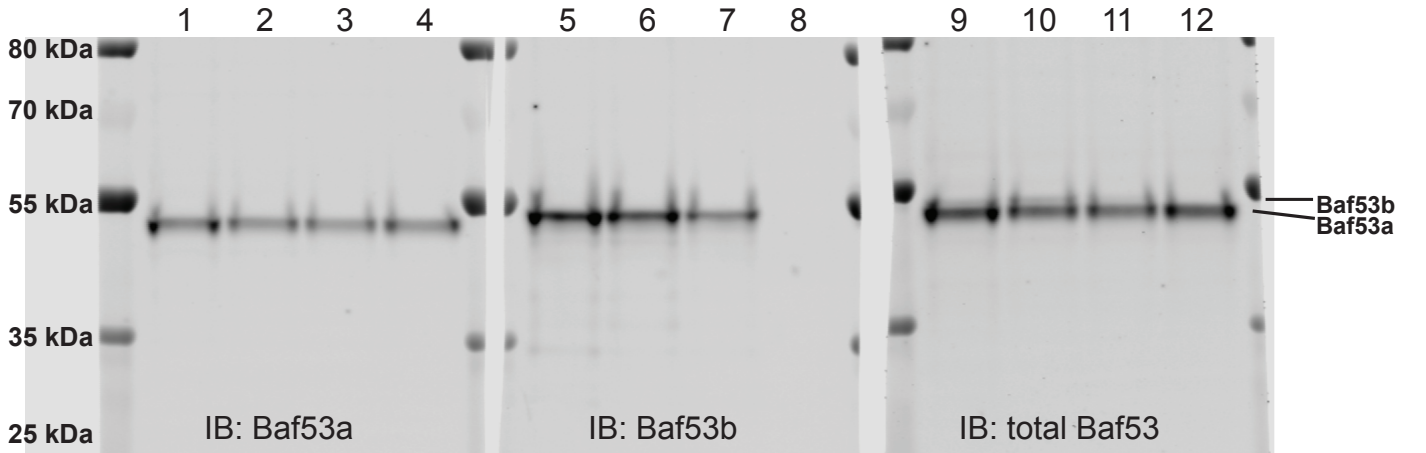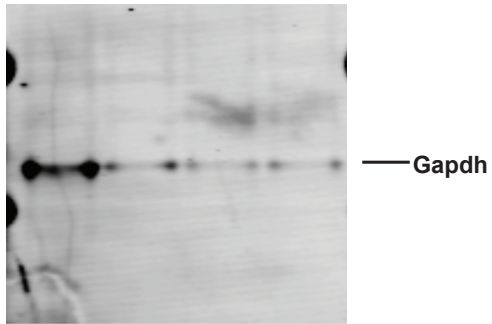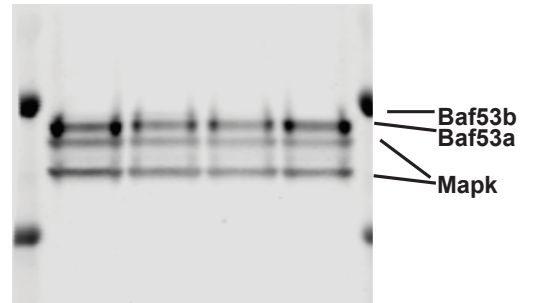

Lanes:  
1,5,9: Baf53b+/- #1 (2x concentrated)  
2,6,10: Wild type (1x conc)  
3,7,11: Baf53b+/- #2 (1x conc)  
4,8,12: Baf53b-/- (1x conc)

**Data related to Fig. S6F and G**

Baf53b heterozygous cross P0 cortex (nBAF), hippocampus (nBAF) or cerebellum (npBAF + nBAF)

-Mouse littermate genotyping

-Input nuclear extracts

-Western blot scans for nBAF immunoprecipitation with anti-Crest from brain tissue nuclear extract (45 ug/cerebellar IP, 65 ug/cortical IP)

Genotypes:

Pup 1: dead, blood on brain, -/-

Pup 2: +/+

Pup 3: -/-

Pup 4: -/-

Pup 5: +/-

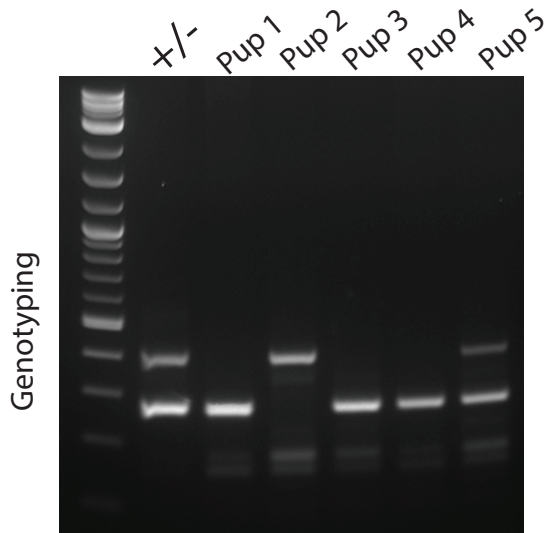

Input nuclear extracts:

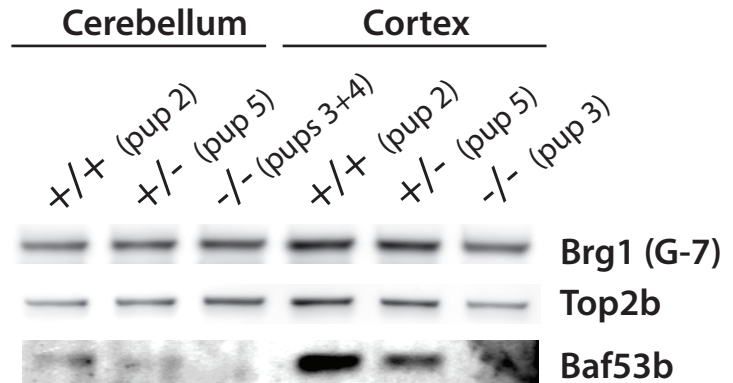

**LI-COR**

Image ID: 0002805\_01  
Acquire Time: Oct 28, 2016 9:56:28 AM

Page 1

Acquisition Information

| # | Image ID   | Acquire Time            | Channels | Resolution | Intensities | Quality | Analysis | Image Name | Comment |
|---|------------|-------------------------|----------|------------|-------------|---------|----------|------------|---------|
| 1 | 0002805_01 | Oct 28, 2016 9:56:28 AM | 700      | 84um       | Auto        | high    | Manual   | 0002805_01 |         |

Image Display Values

| Channel | Color | Minimum | Maximum | K |
|---------|-------|---------|---------|---|
| 700     | Green | 1.46    | 37.6    | 1 |

immunoblot for  
Top: Baf53b (rb), Brg1 (H-88) (rb)

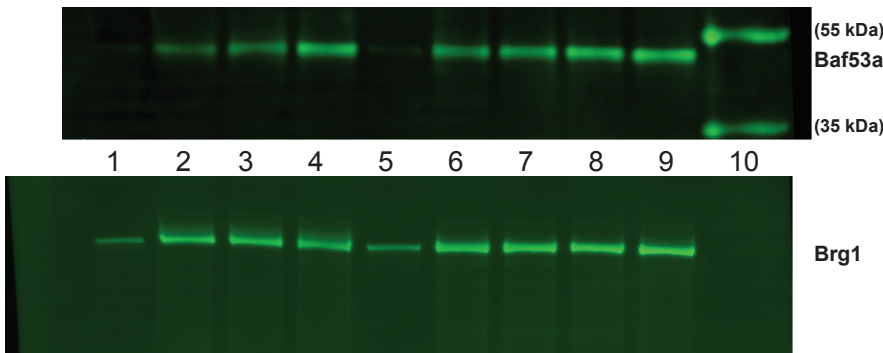

Lanes:

1. P0 cerebellum, input: *Baf53b*<sup>+/+</sup>
2. P0 cerebellum, CREST IP: *Baf53b*<sup>+/+</sup>
3. P0 cerebellum, CREST IP: *Baf53b*<sup>+/-</sup>
4. P0 cerebellum, CREST IP: *Baf53b*<sup>-/-</sup>
5. P0 cortex, input: *Baf53b*<sup>+/+</sup>
6. P0 cortex, CREST IP: *Baf53b*<sup>+/+</sup>
7. P0 cortex, CREST IP: *Baf53b*<sup>+/-</sup>
8. P0 cortex, CREST IP: *Baf53b*<sup>-/-</sup> n=1
9. P0 cortex, CREST IP: *Baf53b*<sup>-/-</sup> n=2
10. Page Ruler Plus

**Replicate experiment shown in Fig. S6J**

E18/DIV7 cortical neuronal nuclei were lysed and exposed to increasing concentrations of salt. The chromatin and soluble fractions were separated by differential centrifugation. Full Western blot images were no longer available.

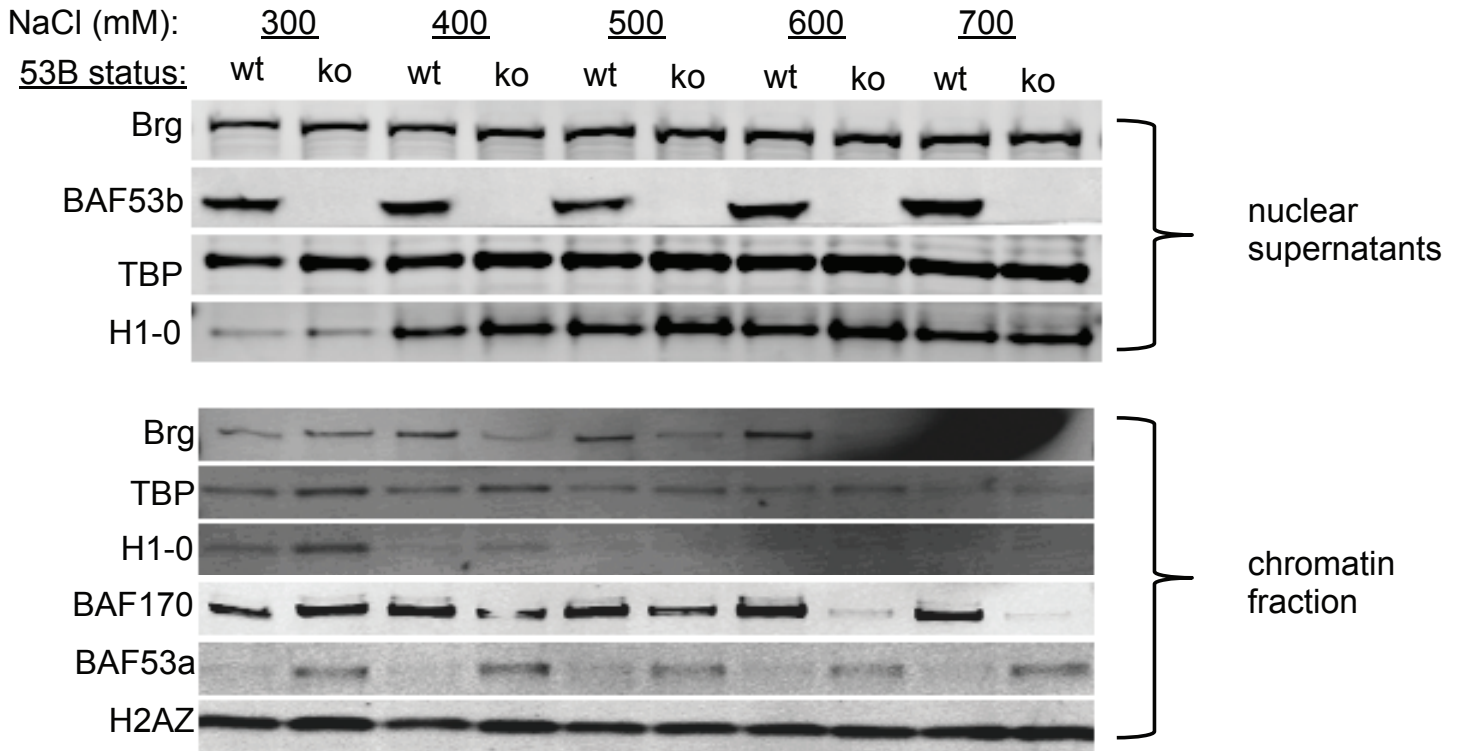

Supplement: pnas.1908238117.sd03.pdf [file pnas.1908238117.sd03.pdf]
